# Supplementary material for: Ionic liquids as an efficient medium for the mechanochemical synthesis of α-AlH3 nano-composites
Source: Royal Society of Chemistry journal article supplement (doi:10.1039/c8ta00533h), 2018-01-01
Supplement: c8ta00533h1.pdf [file c8ta00533h1.pdf]

## Supporting Information

### Ionic liquids as an efficient media assisted mechanochemical synthesis of $\alpha$ -AlH<sub>3</sub> nano-composite

C. W. Duan<sup>a\*</sup>, L. X. Hu<sup>b</sup> and J. L. Ma<sup>c</sup>

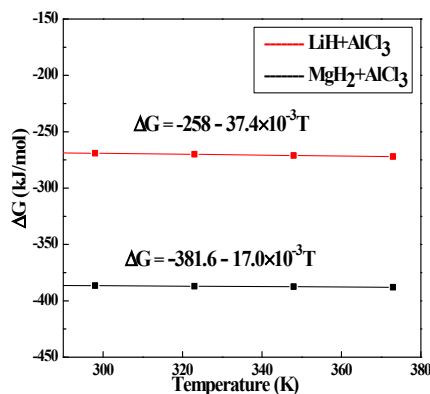

Fig. S1 Free energy of reaction between  $\text{MgH}_2$ - $\text{AlCl}_3$  and  $\text{LiH}$ - $\text{AlCl}_3$  at a temperature range of 273-373K

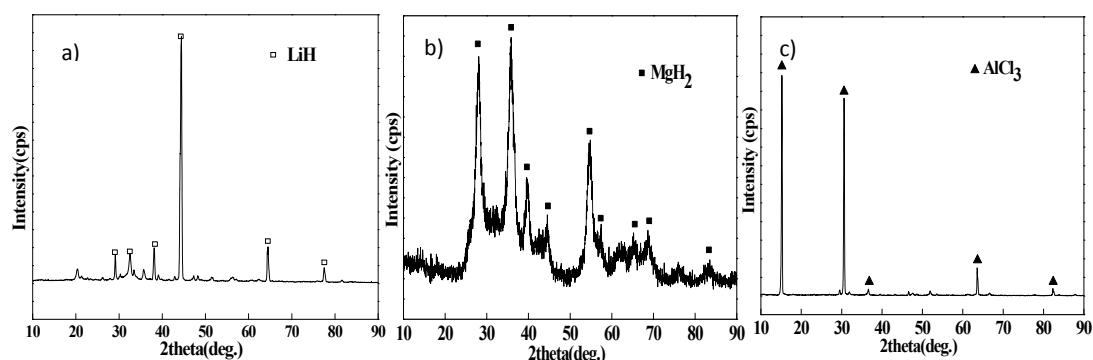

Fig. S2 XRD patterns of a) LiH phase, b) Mg powders milled in hydrogen for 20h, c)  $\text{AlCl}_3$  phase  
It is suggested from Fig. S2b) that the  $\text{MgH}_2$  phase was fully formed until milling Mg in hydrogen for 20 h. Calculated by Scherrer equation based on the XRD patterns, the average crystallite size of  $\text{MgH}_2$  can reach 10 nm. For nanostructured  $\text{MgH}_2$  prepared by ball milling, the activation energy for dehydrogenation can be reduced significantly because there are much more grain boundaries and crystal defects which result in the raising of the average atomic energy level. For example, it was reported by Ouyang<sup>1,2</sup> that Mg(In) solid solution provides a new way to tune the dehydrogenating thermodynamics of  $\text{MgH}_2$ . But, the activation energy for thermally driven dehydrogenating of  $\text{MgH}_2$  was still to be 127.7 kJ/mol. In the present study, the activation energy of prepared  $\text{MgH}_2$  is found to be 82.7 kJ/mol, which is much lower than that reported in Ref. 1 and 2. Thus, nanocrystalline  $\text{MgH}_2$  powders prepared by mechanochemical reaction has an excellent reactivity.

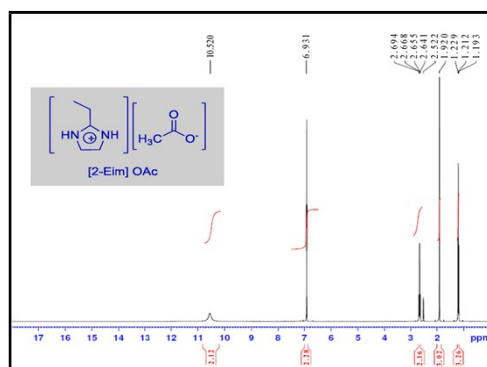

Fig. S3  $^1\text{H}$  NMR of 2-ethyl imidazolium acetate [2-Eim] OAc

$^1\text{H}$ NMR spectra of the [2-Eim]OAc ionic liquid is shown in Fig. S3. The important spectral data of [2-Eim] OAc were presented:  $\delta$  (ppm) 10.52 (s, 2H, N-H), 6.93 (s, 2H), 2.6 (m, 2H,  $\text{CH}_2$ ), 1.92 (s,  $\text{CH}_3$ ), 1.20 (t, 3H,  $\text{CH}_3$ ). It is noted that the important peak of [2-Eim] OAc is related to the hydrogens (N-H) which observed in 10.52 ppm.

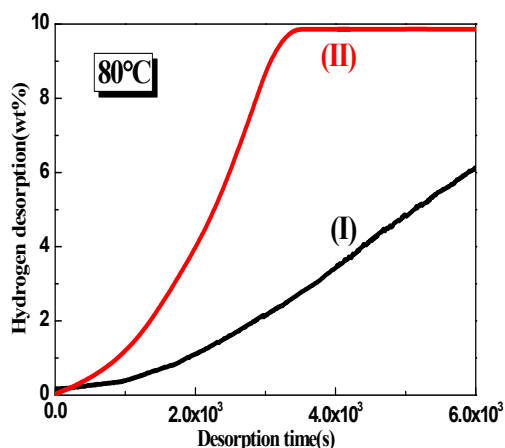

Fig. S4 The de-hydrating curves of  $\alpha\text{-AlH}_3$  nanocomposite heated at  $80^\circ\text{C}$ : (I)  $\alpha\text{-AlH}_3/\text{LiCl}$  nanocomposite (II)  $\alpha\text{-AlH}_3/\text{LiCl}$  doped with LiH.

It was demonstrated by Sandrock<sup>3</sup> that the onset decomposition temperature of  $\text{AlH}_3$  can be reduced to below  $100^\circ\text{C}$  by LiH addition. According to Sandrock's report, 2mol% LiH was added into  $\alpha\text{-AlH}_3/\text{LiCl}$  nano-composite. It can be seen from Fig.S4 that when the dehydrating temperature was fixed at  $80^\circ\text{C}$ , the time of full decomposition decreased rapidly. Compared with the  $\alpha\text{-AlH}_3/\text{LiCl}$  nano-composite without adding LiH,  $\text{AlH}_3$  added with LiH has a perfect dehydrating property with a 9.86wt.% of hydrogen content at  $80^\circ\text{C}$  for 3400 s. This results have good correspondence with the report addressed by Sandrock who also found that decomposition kinetics of  $\text{AlH}_3$  can be accelerated with the effect of the LiH doping.<sup>3</sup>

## Reference

- [1] L. Z. Ouyang, Z. J. Cao and H. Wang, Enhanced dehydriding thermodynamics and kinetics in Mg(In)-MgF<sub>2</sub> composite directly synthesized by plasma milling. *J. Alloy. Compd.*, 2014, **586**, 113-117.
- [2] L. Z. Ouyang, X. S. Yang and H. W. Dong, Structure and hydrogen storage properties of Mg<sub>3</sub>Pr and Mg<sub>3</sub>PrNi<sub>0.1</sub> alloys. *Scripta Mater.*, 2009, **61**, 339-342.
- [3] G. Sandrock, J. Reilly, J. Graetz, w.-m. Zhou, J. Johnson and J. Wegrzyn, Accelerated thermal decomposition of AlH<sub>3</sub> for hydrogen-fueled vehicles. *Appl. Phys. A*, 2005, **80**, 687-690.
